# Supplementary material
Source: PubMed Central journal article supplement (PMC10842032)
Supplement: NIHMS1950202-supplement-Supplementary_Tables_1__2__3__4.pdf [file NIHMS1950202-supplement-Supplementary_Tables_1__2__3__4.pdf]

## Supplementary Table 1. Mouse genotyping primers

### Genotyping Stmn2-KO allele

| Primer | 5' label | SEQUENCE 5' → 3'              | 3' label   | PRIMER TYPE       |
|--------|----------|-------------------------------|------------|-------------------|
| 48340  |          | CTC TCA GCC TCC AGG TTT CT    |            | Common            |
| 48341  |          | GAG GAA AGG GTG CAT TTG G     |            | Wild type Reverse |
| 48342  | FAM      | TGG ATT GTG TCG TGG AAG TGT A | Quencher-1 | WT Probe          |
| 48343  |          | TGC TCT TTA CTG GGC TTT CC    |            | Mutant Reverse    |
| 48344  | HEX      | CCT CAG TGG TGG AGG GC        | Quencher-2 | MUT Probe         |

### Genotyping BAC Tg-STMN2

| Primer | 5' LABEL | SEQUENCE 5' → 3'            | 3' label | PRIMER TYPE                          |
|--------|----------|-----------------------------|----------|--------------------------------------|
| 31704  |          | AGT GGC CTC TTC CAG AAA TG  |          | Internal Positive<br>Control Forward |
| 31705  |          | TGC GAC TGT GTC TGA TTT CC  |          | Internal Positive<br>Control Reverse |
| 52211  |          | CGT GTA CTG ATG CAG GTC TGG |          | Transgene Forward                    |
| 52212  |          | CTG AAG CTC CAG AAA TTG AGA |          | Transgene Reverse                    |

### Genotyping Sarm1 KO allele

| Primer | 5' label | SEQUENCE 5' → 3'            | 3' label | PRIMER TYPE       |
|--------|----------|-----------------------------|----------|-------------------|
| 22162  |          | TGT GGT TTC CAA ATG TGT CAG |          | Mutant Reverse    |
| 49955  |          | GAA ATG CAT GGA GGG GTT G   |          | Common            |
| 49956  |          | CCA CCA AAC GTG TCC AAT C   |          | Wild type Reverse |

**Supplementary Table 2. qPCR Probes**

| <b>qPCR probes</b>                   | <b>Sequence 5' - 3'</b>                      |
|--------------------------------------|----------------------------------------------|
| Mouse STMN2 Fw                       | TGTCACTGATCTGCTCCTGC                         |
| Mouse STMN2 Rev                      | TGGGAGATGGTGGCTTCAAG                         |
| Mouse TDP43 Exon1 Fw                 | GCCTAGCGGAGATTTAAGCA                         |
| Mouse TDP43 Exon 2 Rev               | CATGCCCTGGAACTGGG                            |
| Mouse TDP43 Exon 2 Rev               | CGACAACCACTACCTGAGCC                         |
| Clover fluorescent protein (AAV) Fw  | CGACAACCACTACCTGAGCC                         |
| Clover fluorescent protein (AAV) Rev | GACCATGTGATCGCGCTTCT                         |
| Mouse GAPDH Fw                       | GGCAAATTC AACGGCACAGT                        |
| Mouse GAPDH Rev                      | GGGTCTCGCTCCTGGAAGAT                         |
| Mouse Nrnx1 Fw                       | GTGTCCCAGTGACGATGAGG                         |
| Mouse Nrnx1 Rev<br>Mouse Agbl1 Fw    | CACCTACTCTGGTGGGGTTG<br>TGCTGAACGCGGATGTTCTG |
| Mouse Agbl1 Rev                      | CAGTGAAGTTCTGTTCTGCGT                        |
| Mouse SARM1 Fw NM_172795             | CTCTGCAGCCAGAGAAATGCT                        |
| Mouse SARM1 Rev NM_172795            | GACCCTGAGTTCCTCCGGTA                         |
| Mouse STMN1 Fw NM_019641             | CGCTTGCGAGAGAAGGACAA                         |
| Mouse STMN1 Rev NM_019641            | CGGGACAACCTTAGTCAGCCT                        |
| Mouse STMN3 Fw NM_009133             | GAGGAGCGGAGGAAGACTCA                         |
| Mouse STMN3 Rev NM_009133            | CGCCAGGCGGCTAAAGTTAT                         |
| Mouse STMN4 Fw NM_019675             | GACGGCGAGACCCATCATT                          |
| Mouse STMN4 Rev NM_019675            | TTTCTCCGCGAGGTGTTTCA                         |

**Supplementary Table 3. Antibodies**

| <b>Primary Antibodies</b>                                            |              |                   |             |                 |                         |
|----------------------------------------------------------------------|--------------|-------------------|-------------|-----------------|-------------------------|
| <b>Name</b>                                                          | <b>Cat #</b> | <b>Company</b>    | <b>Host</b> | <b>Dilution</b> | <b>Application</b>      |
| NeuN                                                                 | ABN78        | Millipore-Sigma   | rabbit      | 1:1000          | IHC                     |
| CHAT (Choline acetyltransferase)                                     | AB144P       | Millipore-Sigma   | goat        | 1:100           | IHC                     |
| GFAP-Cy3 conjugated (clone G-A-5)                                    | C9205        | Millipore-Sigma   | mouse       | 1:1000          | IHC                     |
| Iba1 (clone NCNP24)                                                  | 019-19,741   | Wako              | rabbit      | 1:1000          | IHC                     |
| $\alpha$ -BTX ( $\alpha$ -bungarotoxin, Alexa Fluor 555 conjugated)  | B35451       | Invitrogen        | -----       | 1:500           | IHC                     |
| Synaptophysin                                                        | NBP2-25170   | Novus Biologicals | chicken     | 1:500           | IHC                     |
| Neurofilament-H                                                      | AB5539       | Millipore-Sigma   | chicken     | 1:500           | IHC                     |
| Calcitonin gene related peptide (CGRP)                               | Ab36001      | Abcam             | goat        | 1:1000          | IHC                     |
| Lectin IB4 conjugated to Alexa- Fluor 647 (anti-IB4 Alexa Fluor 647) | I32450       | Molecular Probes  | -----       | 1:2000          | IHC                     |
| Human/Mouse Stathmin-2/STMN2 Clone #684433                           | MAB6930      | R&D               | mouse       | 1:200           | IHC (antigen retrieval) |
| Anti-phosphorylated KSP sites in Neurofilament-H and M (SMI-31)      | 50-102-9514  | Biologend         | mouse       | 1:1000          | WB                      |
| Neurofilament-H Clone RT-97                                          | NBP2-29435   | Novus Biologicals | mouse       | 1:500           | WB                      |
| NF-M, Clone NN18                                                     | N5264        | Sigma             | mouse       | 1:1000          | WB                      |
| NF-L, Clone NR4                                                      | N5139        | Sigma             | mouse       | 1:1000          | WB                      |
| Mouse Tubulin $\beta$ 3, Clone TUJ1;                                 | 801202       | Biologend         | mouse       | 1:4000          | WB                      |
| Rabbit Tubulin $\beta$ 3 Clone TUJ1;                                 | 845502       | Biologend         | rabbit      | 1:4000          | WB                      |
| Stathmin-2                                                           | 10586-1-AP   | Proteintech       | rabbit      | 1:1000          | WB                      |
| Stathmin-2                                                           | NBP1-49461   | Novus Biologicals | rabbit      | 1:1000          | WB                      |
| GAPDH Clone 6C5                                                      | ab8245       | Abcam             | mouse       | 1:5000          | WB                      |
| GAPDH Clone 14C10                                                    | 2118         | Cell Signaling    | rabbit      | 1:5000          | WB                      |

| <b>Secondary Antibodies</b>                       |              |                                     |             |                 |                    |
|---------------------------------------------------|--------------|-------------------------------------|-------------|-----------------|--------------------|
| <b>Name</b>                                       | <b>Cat #</b> | <b>Company</b>                      | <b>Host</b> | <b>Dilution</b> | <b>Application</b> |
| Cy3 AffiniPure Donkey anti-Guinea Pig IgG [H1L]   | 706-165-148  | Jackson ImmunoResearch              | Donkey      | 1:500           | IHC                |
| Alexa 488 Donkey anti-Goat IgG [H1L]              | A-11,055     | Invitrogen                          | Donkey      | 1:500           | IHC                |
| Alexa 549 Donkey anti-Rabbit IgG [H1L]            | A-21,207     | Invitrogen                          | Donkey      | 1:500           | IHC                |
| Alexa Fluor 488-conjugated Donkey Anti-Rabbit IgG | 711-545-152  | Jackson ImmunoResearch Laboratories | Donkey      | 1:500           | IHC                |
| Alexa Fluor 488-conjugated Donkey Anti-Mouse IgG  | 715-545-151  | Jackson ImmunoResearch              | Donkey      | 1:500           | IHC                |
| Alexa Fluor 647-conjugated Donkey Anti-Rabbit IgG | 711-605-152  | Jackson ImmunoResearch              | Donkey      | 1:500           | IHC                |
| Alexa Fluor 647-conjugated Donkey Anti-Mouse IgG  | 715-605-151  | Jackson ImmunoResearch              | Donkey      | 1:500           | IHC                |
| Anti-Mouse IgG, HRP-Linked Whole Ab               | 84-848       | Prometheus                          | Sheep       | 1:5000-1:15000  | WB                 |
| Donkey Anti-Rabbit IgG, HRP-Linked Whole Ab       | 84-854       | Prometheus                          | Donkey      | 1:5000-1:15000  | WB                 |

### Supplementary Table 4. FISH probes

| <b>FISH probes</b>           |              |                |                                      |
|------------------------------|--------------|----------------|--------------------------------------|
| <b>Name</b>                  | <b>Cat #</b> | <b>Company</b> | <b>Assay</b>                         |
| RNAscope® Probe- Mm-Stmn2-C2 | 498391-C2    | ACD Biotech    | RNAscope Multiplex Fluorescent Assay |
